# Supplementary material
Source: Springer Nature journal article supplement (https://www.springermedizin.de/resource/supplementary/13058_2014_3424_MOESM3_ESM.pdf/9704150)
Supplement: MOESM3 [file 9704150]

**Table S1. Integrin pathway is among significantly changed signaling pathways in SUM159 T $\beta$ RIII-KD three-dimensional culture system**

| Gene Set Name                               | # Genes in Gene Set (K) | # Genes in Overlap (k) | p-value  |
|---------------------------------------------|-------------------------|------------------------|----------|
| REACTOME_CELL_JUNCTION_ORGANIZATION         | 78                      | 8                      | 7.67E-07 |
| REACTOME_CELL_CELL_COMMUNICATION            | 120                     | 9                      | 2.24E-06 |
| PID_INTEGRIN1_PATHWAY                       | 66                      | 7                      | 3.03E-06 |
| KEGG_CELL_ADHESION_MOLECULES_CAMS           | 134                     | 8                      | 4.31E-05 |
| PID_INTEGRIN3_PATHWAY                       | 43                      | 5                      | 5.20E-05 |
| KEGG_FOCAL_ADHESION                         | 201                     | 9                      | 1.35E-04 |
| REACTOME_CELL_CELL_JUNCTION_ORGANIZATION    | 56                      | 5                      | 1.87E-04 |
| PID_AVB3_INTEGRIN_PATHWAY                   | 75                      | 5                      | 7.29E-04 |
| REACTOME_INTEGRIN_CELL_SURFACE_INTERACTIONS | 79                      | 5                      | 9.23E-04 |
| KEGG_ECM_RECEPTOR_INTERACTION               | 84                      | 5                      | 1.22E-03 |
| REACTOME_EXTRACELLULAR_MATRIX_ORGANIZATION  | 87                      | 5                      | 1.42E-03 |
| REACTOME_ADHERENS_JUNCTIONS_INTERACTIONS    | 27                      | 3                      | 2.05E-03 |

**Table S2. Integrin family members in SUM159 cells three-dimensional cultures with T $\beta$ RIII-KD**

| <b>Gene symbol</b> | <b>Adj. P value</b> |
|--------------------|---------------------|
| <i>ITGA2</i>       | 0.00310994          |
| <i>ITGB2</i>       | 0.00858093          |
| <i>ITGA6</i>       | 0.07342169          |
| <i>ITGB5</i>       | 0.18804443          |
| <i>ITGB1</i>       | 0.2823499           |
| <i>ITGA8</i>       | 0.35612028          |
| <i>ITGA3</i>       | 0.39006295          |
| <i>ITGA4</i>       | 0.49020532          |
| <i>ITGB7</i>       | 0.50179171          |
| <i>ITGA10</i>      | 0.50579062          |
| <i>ITGB4</i>       | 0.56483922          |
| <i>ITGA11</i>      | 0.65315048          |
| <i>ITGB3</i>       | 0.69170401          |
| <i>ITGB6</i>       | 0.70117658          |
| <i>ITGA7</i>       | 0.74009154          |
| <i>ITGAV</i>       | 0.78396341          |
| <i>ITGA5</i>       | 0.78412514          |
| <i>ITGB8</i>       | 0.94109833          |
| <i>ITGA9</i>       | 0.95105451          |
